# Supplementary material
Source: Springer Nature journal article supplement (https://www.springermedizin.de/resource/supplementary/12887_2011_594_MOESM1_ESM.pdf/9475860)

LDC

Preschool

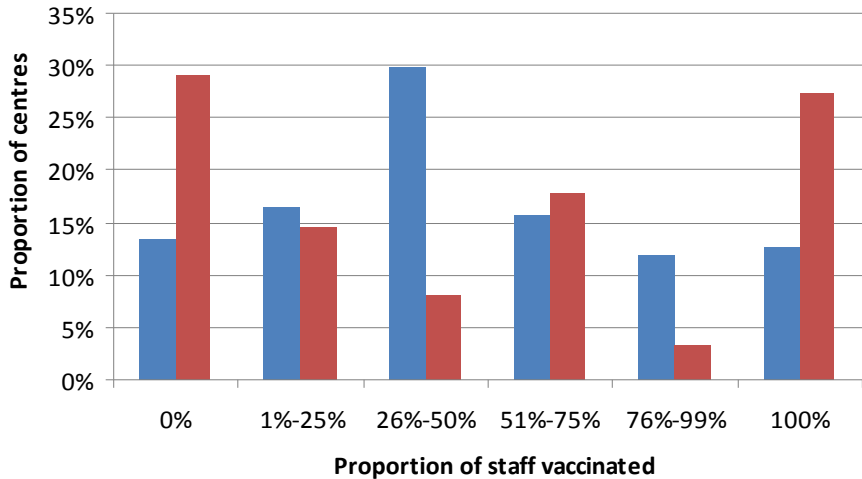

Supplement: MOESM1 [file 9475860]
